# Supplementary material for: Surfactin-functionalized poly(methyl methacrylate) as an eco-friendly nano-adsorbent: from size-controlled scalable fabrication to adsorptive removal of inorganic and organic pollutants
Source: Royal Society of Chemistry journal article supplement (doi:10.1039/c6ra10804k), 2016-01-01
Supplement: c6ra10804k1.pdf [file c6ra10804k1.pdf]

1

## Electronic Supporting Information (ESI)

2 Surfactin functionalized poly(methyl methacrylate) as eco-friendly nano-adsorbent: from size  
3 controlled scalable fabrication to adsorptive removal of inorganic and organic pollutants

4 Debasree Kundu<sup>a,‡</sup>, Chinmay Hazra<sup>a,‡</sup>, Aniruddha Chatterjee<sup>b,\*</sup>, Ambalal Chaudhari<sup>a</sup>,  
5 Satyendra Mishra<sup>b</sup>, Amol Kharat<sup>c</sup> and Kiran Kharat<sup>d</sup>

6 *<sup>a</sup>School of Life Sciences, North Maharashtra University, Jalgaon, Maharashtra, India*

7 *<sup>b</sup>University Institute of Chemical Technology, North Maharashtra University, Jalgaon,*  
8 *Maharashtra, India*

9 *<sup>c</sup>Modern College of Pharmacy, Moshi, Pune, Maharashtra, India*

10 *<sup>d</sup>Department of Biotechnology, Deogiri college, Aurangabad, Maharashtra, India*

11

12

13

14

15

16

17 \*Corresponding author. Present address: Maharashtra Institute of Technology, Aurangabad,  
18 Maharashtra, India. E-mail: aniruddha\_chatterjee2006@yahoo.co.in;  
19 aniruddha.chatterjee@mit.asia

20 ‡These authors contributed equally as first authors in this manuscript

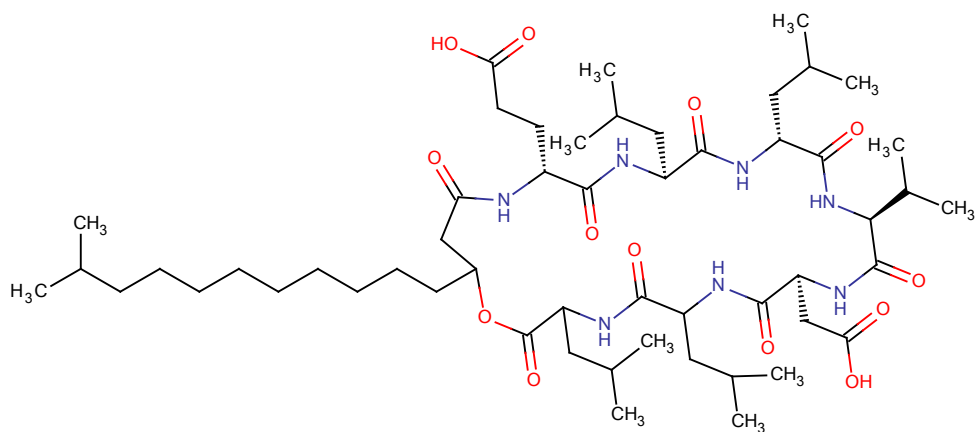

1

2 **Fig. S1.** Overall chemical structure of surfactin lipopeptide.

3

## Determination of monomer conversion, solid content, molecular weights and polydispersity index (PDI)

The percentage of monomer conversion to polymer and latex yield was determined by gravimetric analysis. A small sample (5-10 ml) was taken and placed quickly into a capped vial containing several drops of hydroquinone inhibitor solution to stop the polymerization. The sample was then poured into a pre-weighed watch glass and weighed. It was then dried in an oven at 120 °C until constant weight. A final measurement of the watch glass + dry polymer sample was then made. For each set of operating conditions, experiments were repeated and the repeatability of measurements was within  $\pm 10\%$ , as indicated by error bars on the graphical plots.

The total number of latex particles in the system ( $N_p$ ) and the number of polymer chains per particle ( $N$ ) as well as the conversion ( $X_m$ ) are calculated according to the following equations:

$$N_p = \frac{6\rho_0 V X_m}{\rho \pi D^3} \quad (1)$$

$$N = \frac{4}{3} \frac{\rho \pi (D/2)^3 N_A}{M_n} \quad (2)$$

$$X_m (\%) = \frac{W_1}{W_2} \times 100 \quad (3)$$

where  $\rho_0$  is the density of MMA (0.94 g cm<sup>-3</sup> at 25 °C),  $V$  is the total volume of MMA,  $X_m$  is polymerization conversion,  $\rho$  is the density of PMMA (g cm<sup>-3</sup> at 25 °C),  $D$  is the diameter of the particle,  $N_A$  is  $6.02 \times 10^{23}$  mol<sup>-1</sup>,  $M_n$  is the number-average molecular weight, and  $W_1$  and  $W_2$  are the weights of the polymer and MMA, respectively.

## Energy calculations

### *1. Energy delivered during conventional mechanically stirred emulsion polymerization method*

Voltage input in magnetic stirrer = 230 V.

Current measured using digital multimeter (Model 801, Mecco Instruments Pvt. Ltd., India) = 37 mA =  $37 \times 10^{-3}$  A.

Power input in overhead stirrer = voltage input  $\times$  current measured = 230 (V)  $\times$   $37 \times 10^{-3}$  (A) = 8.51 W (J/s).

Time required for completion of reaction = 1 h (3600 s).

Net energy delivered during conventional method = power input in magnetic stirrer  $\times$  time required for completion of reaction = 8.51 J/s  $\times$  3600 s = 30636 J = 30.636 kJ.

Energy supplied in form of heat to maintain reaction temperature 55 °C =  $mC_{p, \text{mix}} (T_{\text{process}} - T_{\text{ref}})$  =  $130.38 \times 4.0058 \times (55 - 25)$  = 15668.3 J = 15.67 kJ.

Total energy supplied during conventional method = 30.636 + 15.67 = 46.31 kJ.

Quantity of material processed = quantity of [water + KPS + surfactin + MMA] = 100 ml + 0.25 g + 0.025 g + 5 g = 105.28 g.

Net energy supplied for processing of material using conventional method = net energy delivered during conventional method/quantity of material processed = 46.31 (kJ) / 105.28 (g) =  $43.98 \times 10^{-2}$  (kJ/g). (A)

### *2. Energy delivered during sonochemical polymerization*

Energy delivered during sonication = energy required to synthesize nPMMA.

Electrical energy delivered during sonication (indicated by the power meter) = 53.5 kJ.

Efficiency of horn taken for the calculation = 18.9% (estimated independently using calorimetric studies).

Actual energy delivered by horn during sonication = energy delivered during sonication using horn  $\times$  efficiency of horn =  $53.5 \times 18.9/100 = 10.11$  kJ.

Quantity of material processed = quantity of [water + KPS + surfactin + MMA] = 100 ml + 0.25 g + 0.025 g + 5 g = 105.28 g.

Net energy supplied for processing of material using sonochemical method = actual energy delivered by horn during sonication/quantity of material processed =  $10.11$  (kJ) /  $105.28$  (g) =  $9.60 \times 10^{-2}$  (kJ/g). (B)

### *3. Energy saved*

Net energy saved = [net energy supplied for processing of material using atomized microemulsion method (A)] - [net energy supplied for processing of material using sonochemical emulsion polymerization (B)] =  $43.98 \times 10^{-2}$  (kJ/g) -  $9.60 \times 10^{-2}$  (kJ/g) =  $34.38 \times 10^{-2}$  (kJ/g).

## **Calculation of cavitation yield**

### *1. Conventional mechanically stirred emulsion polymerization*

Rate of polymerization =  $1.26$  g l<sup>-1</sup>

Power density (J l<sup>-1</sup>) = supplied total electrical energy =  $46.31$  kJ =  $46310$  J l<sup>-1</sup>

Cavitation yield =  $1.26$  (g l<sup>-1</sup>) /  $46310$  (J l<sup>-1</sup>) =  $0.27 \times 10^{-4}$  g J<sup>-1</sup>

### *2. sonochemical polymerization*

Rate of polymerization =  $1.51$  g l<sup>-1</sup>

Power density (J l<sup>-1</sup>) = supplied total electrical energy =  $10.11$  kJ =  $10110$  J l<sup>-1</sup>

Cavitation yield =  $1.51$  (g l<sup>-1</sup>) /  $10110$  (J l<sup>-1</sup>) =  $1.5 \times 10^{-4}$  g J<sup>-1</sup>

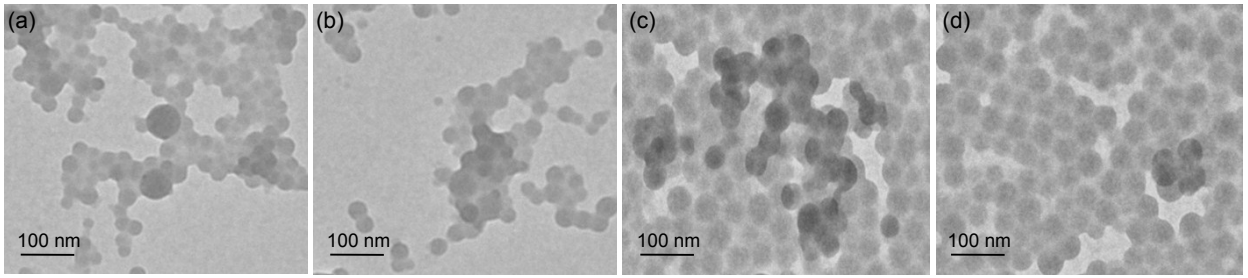

**Fig. S2.** Effect of surfactin concentration (wt. % of MMA) on morphology and size of nPMMA<sub>SP</sub> particles: (a) 1%, (b) 2%, (c) 3% and (d) 4%. Other conditions are same as Fig. 1.

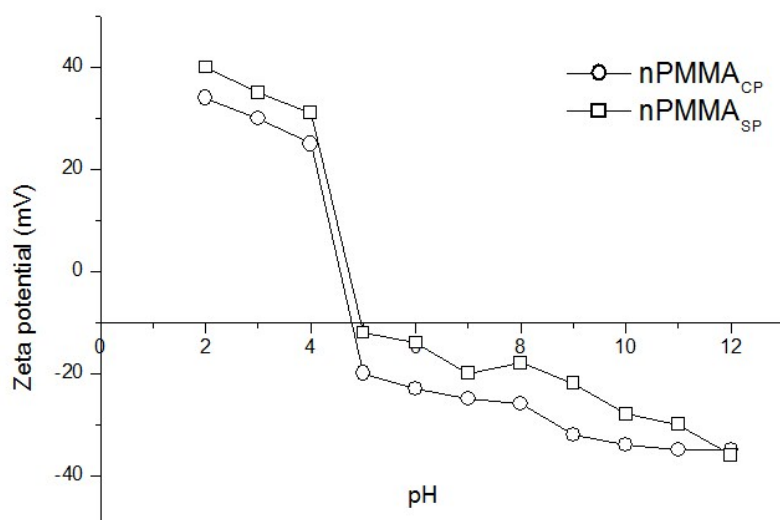

**Fig. S3.** The pH dependence of zeta-potential of nPMMA<sub>SP</sub> and nPMMA<sub>CP</sub> particles. (Reaction conditions: nPMMA<sub>SP</sub>: monomer-to-water 20 wt.%; monomer-to-initiator 0.4 wt.%; surfactin 4 wt.%, calculated vs monomer; temperature, 55±2 °C; time, 1 h; nPMMA<sub>CP</sub>: monomer-to-water 20 wt.%; monomer-to-initiator 0.4 wt.%; surfactin 4 wt.%, calculated vs monomer; temperature, 55±2 °C; agitation, 250 rpm; time, 1 h).

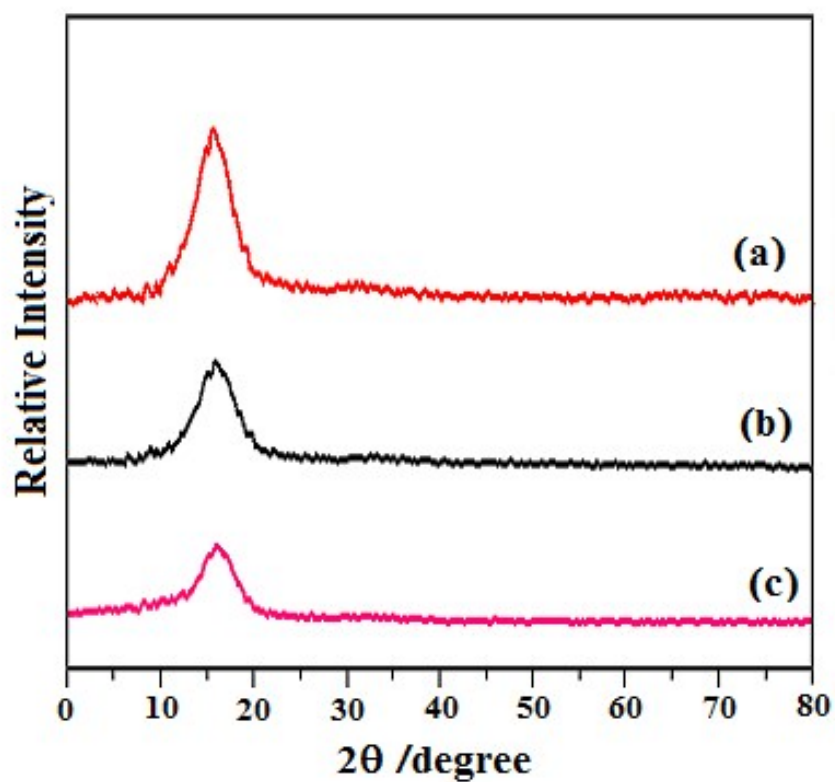

**Fig. S4.** XRD patterns of (a) nPMMA<sub>SP</sub>, (b) nPMMA<sub>CP</sub> and (c) bulk PMMA.

The diffraction peak observed at 15.10° was assigned to the amorphous phase of PMMA. This peak was more prominent in nPMMA<sub>SP</sub>. It suggested the crystalline nature of nPMMA<sub>SP</sub> was more than nPMMA<sub>CP</sub> and bulk PMMA.



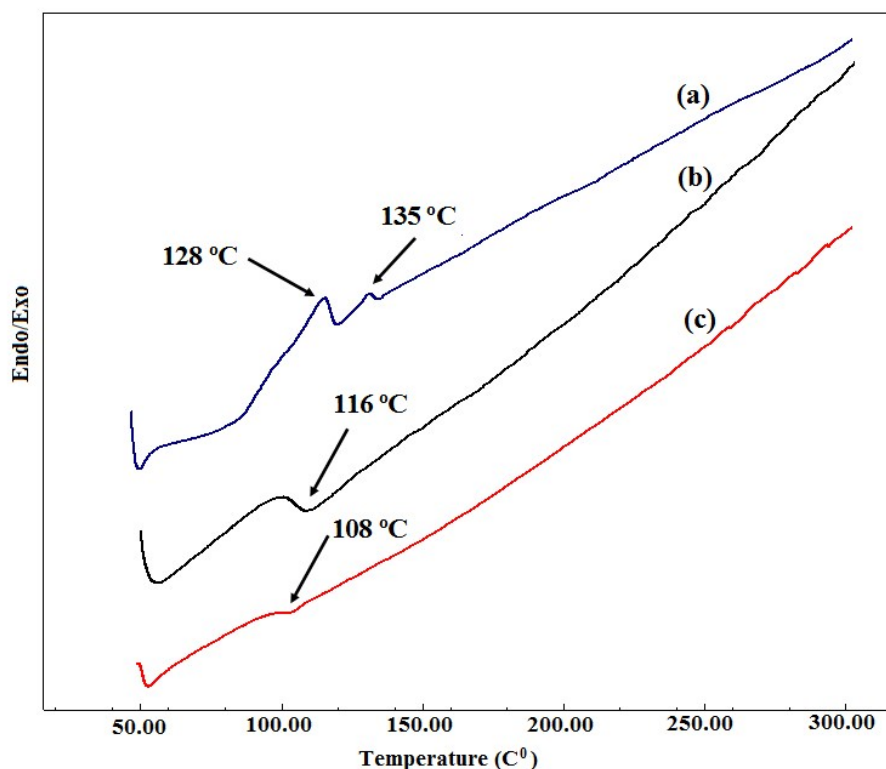

**Fig. S5.** DSC curves of (a) nPMMA<sub>SP</sub> and (b) nPMMA<sub>CP</sub> and (c) bulk PMMA.

It was observed that first scan of nPMMA<sub>SP</sub> showed two step exothermic peaks at 128 and 135 °C that were attributed to  $T_{g1}$  along with respective peaks of  $T_m$  arising due to the presence of little amount of surfactin (Fig. S5a). This finding corroborated with the thin shell layer of biosurfactants observed in TEM. The lower value of  $T_{g1}$  (Fig. S5b) for nPMMA<sub>CP</sub> (116 °C) was due to its relatively large size and lower surface area as compared to nPMMA<sub>SP</sub>. Moreover, the peak for surfactin shell could not be detected due to poor grafting of surfactin onto nPMMA in case of nPMMA<sub>CP</sub>. Bulk PMMA showed regular  $T_g$  at 108 °C like commercial grade PMMA (Fig. S5c). The reason for high  $T_g$  of polymer nanoparticles than bulk PMMA might be a decrease in particle size to nano-scale that results in an increase in surface area and higher surface energy.

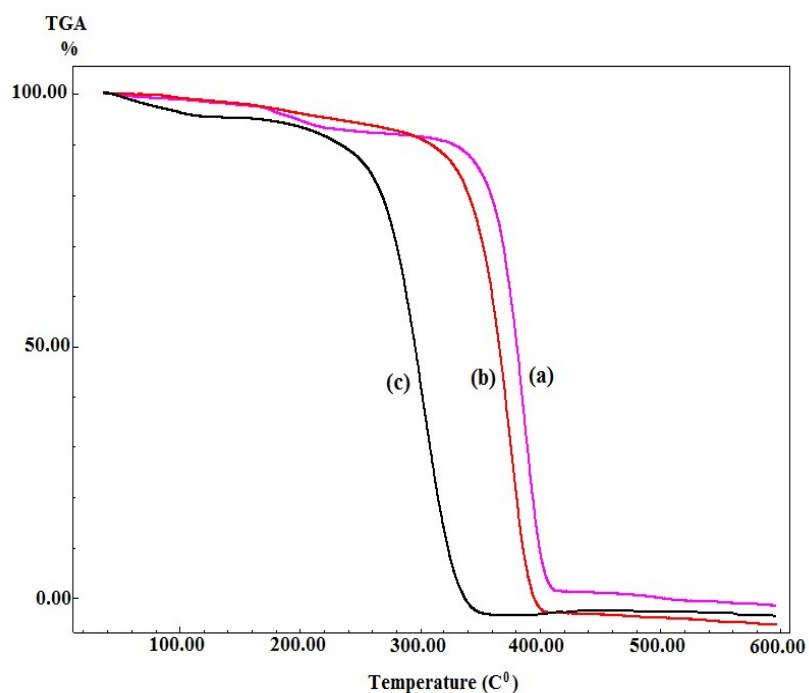

**Fig. S6.** TGA thermogram of (a) nPMMA<sub>SP</sub> and (b) nPMMA<sub>CP</sub> and (c) bulk PMMA.

A remarkable change in thermal behaviour between nPMMA<sub>SP</sub>, nPMMA<sub>CP</sub> and bulk PMMA was observed. The nPMMA<sub>SP</sub> showed higher thermal stability [ $d_{on} = 372$  °C and  $d_{off} = 415$  °C with % weight loss ( $W_L$ ) = 100%] than nPMMA<sub>CP</sub> [ $d_{on} = 352$  °C and  $d_{off} = 406$  °C with % weight loss ( $W_L$ ) = 100%] and bulk PMMA [ $d_{on} = 282$  °C and  $d_{off} = 356$  °C with 100%  $W_L$ ]. Thus, the thermal stability pattern followed the order: nPMMA<sub>SP</sub> > nPMMA<sub>CP</sub> > bulk PMMA.

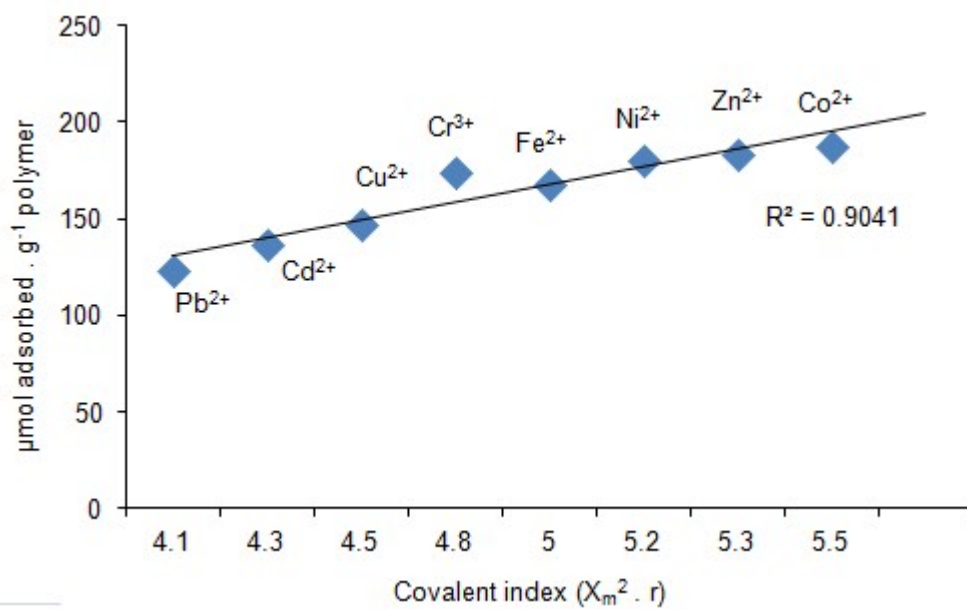

**Fig. S7.** Plot of the adsorption capacities against the covalent indices.

| <b>Parameter</b>       | <b>Setting</b>           |
|------------------------|--------------------------|
| $\lambda$              | 130 nm to 770 nm         |
| RF Power               | 1300 W                   |
| Nebulizer              | Low flow                 |
| Plasma Flow            | 15 l min <sup>-1</sup>   |
| Auxiliary Flow         | 0.2 l min <sup>-1</sup>  |
| Nebulizer Flow         | 0.8 l min <sup>-1</sup>  |
| Pump Rate/ Sample Flow | 1.5 ml min <sup>-1</sup> |
| Spray Chamber          | HF resistant cyclonic    |
| Integration Time       | 10-20 seconds            |
| Number of replicates   | 3                        |

**Table S1.** ICP-AES instrumental operating parameters used for the determination of potentially toxic metals binding to nano-adsorbents used in this study.

| Run                                                    | MMA:KPS<br>(wt.%) | Solid content<br>(%) | $t^*_{\text{blue}}$ (min) | Particle size (nm) |                | Polydispersity<br>index | $N_p \times 10^{18}$ | $N$ |
|--------------------------------------------------------|-------------------|----------------------|---------------------------|--------------------|----------------|-------------------------|----------------------|-----|
|                                                        |                   |                      |                           | DLS                | TEM            |                         |                      |     |
| Sonochemical emulsion polymerization                   |                   |                      |                           |                    |                |                         |                      |     |
| 1                                                      | 0.0               | 12.171±0.122         | 11                        | 218.137±6.554      | 180.011±10.550 | 0.952±0.012             | 0.913±0.552          | 11  |
| 2                                                      | 0.1               | 13.153±0.321         | 09                        | 138.662±11.833     | 106.557±10.322 | 0.741±0.066             | 3.935±0.116          | 23  |
| 3                                                      | 0.2               | 14.155±0.116         | 07                        | 139.538±6.115      | 105.086±10.555 | 0.894±0.092             | 4.664±0.562          | 24  |
| 4                                                      | 0.3               | 16.882±0.344         | 07                        | 104.512±8.831      | 81.055±7.510   | 0.732±0.122             | 6.317±0.124          | 21  |
| 5                                                      | 0.4               | 27.534±0.217         | 04                        | 75.421±2.832       | 60.225±1.511   | 0.554±0.092             | 7.883±0.323          | 14  |
| 6                                                      | 0.5               | 18.682±0.217         | 06                        | 90.554±7.894       | 79.522±1.833   | 0.911±0.166             | 7.032±0.339          | 19  |
| 7                                                      | 1.0               | 17.152±0.143         | 06                        | 79.552±11.446      | 73.625±1.723   | 0.655±0.124             | 6.964±0.321          | 18  |
| 8                                                      | 1.5               | 25.551±0.222         | 05                        | 72.511±10.871      | 63.512±3.476   | 0.727±0.164             | 6.551±0.552          | 14  |
| 9                                                      | 2.0               | 22.155±0.344         | 05                        | 76.025±5.112       | 64.533±4.222   | 0.643±0.088             | 4.877±0.803          | 15  |
| 10                                                     | 3.0               | 21.693±0.255         | 04                        | 75.523±3.835       | 66.216±3.821   | 0.592±0.074             | 3.714±0.221          | 17  |
| Conventional polymerization (with mechanical stirring) |                   |                      |                           |                    |                |                         |                      |     |
| 1                                                      | 0.0               | 11.142±0.124         | 14                        | 229.025±12.912     | 190.088±7.444  | 0.973±0.088             | 0.855±0.188          | 13  |
| 2                                                      | 0.1               | 12.571±0.361         | 12                        | 155.013±10.225     | 125.057±12.875 | 0.752±0.071             | 3.143±0.255          | 21  |
| 3                                                      | 0.2               | 13.144±0.112         | 11                        | 131.085±7.287      | 110.024±10.514 | 0.806±0.150             | 3.618±0.624          | 20  |
| 4                                                      | 0.3               | 14.856±0.333         | 09                        | 110.511±9.132      | 85.533±6.527   | 0.711±0.033             | 5.511±0.255          | 23  |
| 5                                                      | 0.4               | 25.554±0.242         | 07                        | 79.533±2.562       | 72.341±3.522   | 0.632±0.061             | 6.722±0.511          | 12  |
| 6                                                      | 0.5               | 18.682±0.114         | 07                        | 95.542±2.830       | 80.066±3.555   | 0.875±0.075             | 6.777±0.222          | 21  |
| 7                                                      | 1.0               | 16.551±0.211         | 08                        | 100.016±8.732      | 85.042±5.425   | 0.633±0.177             | 5.854±0.541          | 25  |
| 8                                                      | 1.5               | 22.554±0.224         | 05                        | 90.088±6.656       | 82.552±6.138   | 0.633±0.055             | 6.183±0.207          | 15  |
| 9                                                      | 2.0               | 21.133±0.313         | 05                        | 95.035±8.555       | 90.086±13.565  | 0.662±0.021             | 4.537±0.212          | 18  |
| 10                                                     | 3.0               | 20.652±0.115         | 05                        | 135.017±8.937      | 116.211±11.558 | 0.697±0.044             | 3.653±0.443          | 14  |

\*: the time when the colour of the microemulsion turns blue

**Table S2.** Effect of monomer-to-initiator weight ratios on particle size, PDI, conversion,  $N_p$  and  $N$  of the particles. Conditions are as in Fig. 1.

| Run                                                    | MMA:water (wt.%) | Particle size (nm) |        | Polydispersity index | $N_p \times 10^{18}$ | $N$ |
|--------------------------------------------------------|------------------|--------------------|--------|----------------------|----------------------|-----|
|                                                        |                  | DLS                | TEM    |                      |                      |     |
| Sonochemical emulsion polymerization                   |                  |                    |        |                      |                      |     |
| 1                                                      | 5                | 88.542             | 66.521 | 0.622                | 6.783                | 14  |
| 2                                                      | 10               | 119.515            | 85.017 | 0.721                | 6.557                | 14  |
| 3                                                      | 15               | 114.553            | 90.044 | 0.713                | 5.883                | 15  |
| 3                                                      | 20               | 79.016             | 60.027 | 0.552                | 7.612                | 13  |
| Conventional polymerization (with mechanical stirring) |                  |                    |        |                      |                      |     |
| 1                                                      | 5                | 90.557             | 68.066 | 0.657                | 7.004                | 16  |
| 2                                                      | 10               | 111.525            | 85.549 | 0.705                | 7.222                | 17  |
| 3                                                      | 15               | 115.578            | 92.026 | 0.754                | 7.254                | 18  |
| 4                                                      | 20               | 75.055             | 73.022 | 0.613                | 7.102                | 15  |

**Table S3.** Effect of MMA concentration on particle size, PDI, conversion,  $N_p$  and  $N$  of the particles. Other conditions are same as Fig. 1.

| Run | Acoustic amplitude (%) | Energy input (kJ) | Actual power dissipated ( $P$ , W) (measured calorimetrically) | Power input per unit volume ( $\text{kW/m}^3$ ) | Efficiency (%) | Particle size (nm) |         | Polydispersity index | $N_p \times 10^{18}$ | $N$ | Conversion (%) |
|-----|------------------------|-------------------|----------------------------------------------------------------|-------------------------------------------------|----------------|--------------------|---------|----------------------|----------------------|-----|----------------|
|     |                        |                   |                                                                |                                                 |                | DLS                | TEM     |                      |                      |     |                |
| 1   | 30                     | 23.811            | 22.112                                                         | 497.944                                         | 9.212          | 220.544            | 182.077 | 0.981                | 0.922                | 10  | 67.055         |
| 2   | 40                     | 36.215            | 31.433                                                         | 751.552                                         | 13.111         | 130.532            | 103.036 | 0.745                | 3.963                | 22  | 77.112         |
| 3   | 50                     | 53.522            | 45.543                                                         | 1136.841                                        | 18.967         | 79.511             | 60.044  | 0.553                | 7.632                | 13  | 91.233         |
| 4   | 65                     | 67.717            | 60.022                                                         | 1413.514                                        | 25.055         | 120.043            | 83.052  | 0.752                | 6.251                | 20  | 85.355         |
| 5   | 70                     | 77.118            | 65.054                                                         | 1607.504                                        | 27.183         | 105.022            | 75.513  | 0.663                | 6.573                | 19  | 81.088         |

**Table S4.** Effect of acoustic amplitude on particle size, PDI, conversion,  $N_p$  and  $N$  of nPMMA<sub>SP</sub> particles.

| Run                                                    | Wt. % biosurfactant (of MMA) | Particle size (nm) |        | Polydispersity index | $N_p \times 10^{18}$ | $N$ |
|--------------------------------------------------------|------------------------------|--------------------|--------|----------------------|----------------------|-----|
|                                                        |                              | DLS                | TEM    |                      |                      |     |
| Sonochemical emulsion polymerization                   |                              |                    |        |                      |                      |     |
| 1                                                      | 1.0                          | 120.077            | 85.027 | 0.704                | 5.544                | 14  |
| 2                                                      | 2.0                          | 90.022             | 67.512 | 0.632                | 6.751                | 14  |
| 3                                                      | 3.0                          | 110.037            | 82.044 | 0.734                | 6.613                | 13  |
| 4                                                      | 4.0                          | 85.054             | 60.036 | 0.572                | 7.577                | 14  |
| Conventional polymerization (with mechanical stirring) |                              |                    |        |                      |                      |     |
| 1                                                      | 1.0                          | 120.022            | 85.082 | 0.791                | 6.233                | 17  |
| 2                                                      | 2.0                          | 90.016             | 67.555 | 0.651                | 7.264                | 15  |
| 3                                                      | 3.0                          | 110.052            | 82.023 | 0.762                | 7.172                | 18  |
| 4                                                      | 4.0                          | 85.073             | 70.516 | 0.513                | 6.735                | 14  |

**Table S5.** Effect of surfactin concentration on particle size, PDI, conversion,  $N_p$  and  $N$  of the particles. Other conditions are same as Fig. 1.



| <b>Model</b>                   | <b>Parameters</b>                                | <b>Co<sup>2+</sup></b> | <b>Zn<sup>2+</sup></b> | <b>Ni<sup>2+</sup></b> | <b>Cr<sup>3+</sup></b> |
|--------------------------------|--------------------------------------------------|------------------------|------------------------|------------------------|------------------------|
| <b>Pseudo-first-order</b>      | $k_1$ (min <sup>-1</sup> )                       | 0.038                  | 0.045                  | 0.044                  | 0.032                  |
|                                | $q_{e,calc}$ (mg g <sup>-1</sup> )               | 30.155                 | 28.463                 | 27.434                 | 34.141                 |
|                                | $R^2$                                            | 0.943                  | 0.947                  | 0.935                  | 0.953                  |
|                                | $RMSE$                                           | 0.031                  | 0.024                  | 8.652                  | 0.814                  |
|                                | $ERRSQ$                                          | 0.242                  | 0.173                  | 63.303                 | 6.431                  |
| <b>Pseudo-second-order</b>     | $k_2$ (g mg <sup>-1</sup> min <sup>-1</sup> )    | 0.624                  | 0.914                  | 0.137                  | 0.532                  |
|                                | $q_{e,calc}$ (mg g <sup>-1</sup> )               | 34.656                 | 34.022                 | 31.552                 | 44.088                 |
|                                | $R^2$                                            | 0.998                  | 0.999                  | 0.999                  | 0.994                  |
|                                | $RMSE$                                           | 0.016                  | 0.003                  | 0.812                  | 0.748                  |
|                                | $ERRSQ$                                          | 0.117                  | 0.034                  | 6.455                  | 6.582                  |
| <b>Elovich</b>                 | $\alpha$ (mg g <sup>-1</sup> min <sup>-1</sup> ) | 5.69E + 24             | 1.66E + 28             | 68.4162                | 3314.526               |
|                                | $\beta$ (g mg <sup>-1</sup> )                    | 28.572                 | 27.863                 | 6.983                  | 27.114                 |
|                                | $R^2$                                            | 0.932                  | 0.956                  | 0.986                  | 0.991                  |
|                                | $RMSE$                                           | 0.085                  | 0.039                  | 6.372                  | 6.831                  |
|                                | $ERRSQ$                                          | 0.689                  | 0.477                  | 8.105                  | 6.214                  |
| <b>Intraparticle diffusion</b> | $k_d$ (mg g <sup>-1</sup> min <sup>-0.5</sup> )  | 0.005                  | 0.008                  | 0.037                  | 0.014                  |
|                                | $C$ (mg g <sup>-1</sup> )                        | 30.683                 | 32.111                 | 30.473                 | 43.572                 |
|                                | $R^2$                                            | 0.974                  | 0.982                  | 0.955                  | 0.962                  |
|                                | $RMSE$                                           | 0.027                  | 0.082                  | 3.178                  | 5.166                  |
|                                | $ERRSQ$                                          | 0.587                  | 0.325                  | 8.144                  | 6.024                  |

**Table S6.** Kinetic model parameters and error function data for the metal ions sorption onto nPMMA<sub>SP</sub> particles.

| <b>Isotherms</b>        | <b>Parameters</b>           | <b>Co<sup>2+</sup></b> | <b>Zn<sup>2+</sup></b> | <b>Ni<sup>2+</sup></b> | <b>Cr<sup>3+</sup></b> |
|-------------------------|-----------------------------|------------------------|------------------------|------------------------|------------------------|
| <b>Langmuir</b>         | $Q_0$ (mg g <sup>-1</sup> ) | 24.573                 | 25.857                 | 27.843                 | 36.479                 |
|                         | $K_L$ (l mg <sup>-1</sup> ) | 0.044                  | 0.031                  | 0.038                  | 0.042                  |
|                         | $R^2$                       | 0.904                  | 0.895                  | 0.937                  | 0.983                  |
|                         | $RMSE$                      | 0.066                  | 0.012                  | 0.568                  | 0.552                  |
|                         | $ERRSQ$                     | 0.311                  | 0.432                  | 3.558                  | 2.637                  |
| <b>Freundlich</b>       | $K_F$                       | 7.471                  | 5.213                  | 4.332                  | 4.884                  |
|                         | $1/n$                       | 0.532                  | 0.441                  | 0.383                  | 0.414                  |
|                         | $R^2$                       | 0.927                  | 0.958                  | 0.962                  | 0.902                  |
|                         | $RMSE$                      | 0.088                  | 0.853                  | 1.274                  | 1.548                  |
|                         | $ERRSQ$                     | 10.889                 | 2.442                  | 3.769                  | 2.551                  |
| <b>Temkin</b>           | $b_T$                       | 9.664                  | 8.892                  | 6.432                  | 9.221                  |
|                         | $A_T$ (l g <sup>-1</sup> )  | 1.183                  | 2.122                  | 0.443                  | 0.522                  |
|                         | $R^2$                       | 0.933                  | 0.944                  | 0.921                  | 0.922                  |
|                         | $RMSE$                      | 0.042                  | 0.017                  | 0.441                  | 0.502                  |
|                         | $ERRSQ$                     | 0.818                  | 0.779                  | 1.764                  | 3.374                  |
| <b>Redlich-Peterson</b> | $K_R$ (l g <sup>-1</sup> )  | 0.781                  | 1.374                  | 4.733                  | 5.662                  |
|                         | $a_R$ (mg <sup>-1</sup> )   | 0.055                  | 0.132                  | 0.035                  | 0.042                  |
|                         | $g$                         | 10.221                 | 0.834                  | 0.942                  | 0.785                  |
|                         | $R^2$                       | 0.954                  | 0.955                  | 0.962                  | 0.944                  |
|                         | $RMSE$                      | 0.033                  | 0.021                  | 0.034                  | 0.104                  |
|                         | $ERRSQ$                     | 0.219                  | 0.422                  | 1.215                  | 1.593                  |
| <b>Sips</b>             | $K_S$ (l g <sup>-1</sup> )  | 0.042                  | 0.081                  | 0.031                  | 0.044                  |
|                         | $Q_S$ (mg g <sup>-1</sup> ) | 31.152                 | 30.528                 | 29.471                 | 40.143                 |
|                         | $n_S$                       | 0.943                  | 0.052                  | 1.232                  | 1.621                  |
|                         | $R^2$                       | 0.977                  | 0.953                  | 0.951                  | 0.962                  |
|                         | $RMSE$                      | 0.037                  | 0.088                  | 0.044                  | 0.492                  |
|                         | $ERRSQ$                     | 0.204                  | 0.394                  | 1.032                  | 1.042                  |

**Table S7.** Isotherm parameters and error deviation data for the adsorption of Co<sup>2+</sup>, Zn<sup>2+</sup>, Ni<sup>2+</sup> and Cr<sup>3+</sup> onto nPMMA<sub>SP</sub>.

| Model parameters               | Co <sup>2+</sup> retention capacity<br>(mg g <sup>-1</sup> ) |        |
|--------------------------------|--------------------------------------------------------------|--------|
|                                | -20%                                                         | +20%   |
| <b>Langmuir</b>                |                                                              |        |
| $Q_0$ (mg g <sup>-1</sup> )    | 30.448                                                       | 30.977 |
| $K_L$ (l mg <sup>-1</sup> )    | 30.545                                                       | 30.757 |
| <b>Freundlich</b>              |                                                              |        |
| $K_F$                          | 30.656                                                       | 30.757 |
| $n$                            | 30.541                                                       | 30.855 |
| <b>Temkin</b>                  |                                                              |        |
| $b_T$                          | 33.785                                                       | 31.583 |
| $A_T$ (l g <sup>-1</sup> )     | 32.882                                                       | 31.555 |
| <b>Redlich-Peterson</b>        |                                                              |        |
| $K_R$ (l g <sup>-1</sup> )     | 31.782                                                       | 31.733 |
| $a_R$ (mg <sup>-1</sup> )      | 30.557                                                       | 30.463 |
| $g$                            | 32.188                                                       | 32.056 |
| <b>Sips</b>                    |                                                              |        |
| $K_S$ (l g <sup>-1</sup> )     | 30.555                                                       | 30.146 |
| $Q_S$ (mg g <sup>-1</sup> )    | 30.505                                                       | 30.478 |
| $n_S$                          | 31.035                                                       | 30.862 |
| <b>Pseudo-first-order</b>      |                                                              |        |
| $k_1$                          | 30.066                                                       | 30.212 |
| $q_e$                          | 30.882                                                       | 31.044 |
| <b>Pseudo-second-order</b>     |                                                              |        |
| $k_2$                          | 30.062                                                       | 30.015 |
| $q_e$                          | 30.112                                                       | 30.026 |
| <b>Elovich</b>                 |                                                              |        |
| $\alpha$                       | 33.565                                                       | 31.511 |
| $\beta$                        | 32.805                                                       | 31.152 |
| <b>Intraparticle diffusion</b> |                                                              |        |
| $k_d$                          | 32.647                                                       | 31.505 |
| $C$                            | 31.893                                                       | 31.051 |

**Table S8.** Parametric sensitivity of the model parameters for Co<sup>2+</sup>.

| Metal ions             | $\Delta H^\circ$ (kJ mol <sup>-1</sup> ) | $\Delta S^\circ$ (J mol <sup>-1</sup> K <sup>-1</sup> ) | $\Delta G^\circ$ (kJ mol <sup>-1</sup> ) |        |        |
|------------------------|------------------------------------------|---------------------------------------------------------|------------------------------------------|--------|--------|
|                        |                                          |                                                         | 303 K                                    | 313 K  | 323 K  |
| <b>Co<sup>2+</sup></b> | -18.966                                  | -43.554                                                 | -3.556                                   | -3.462 | -2.401 |
| <b>Zn<sup>2+</sup></b> | -8.932                                   | -33.442                                                 | -0.205                                   | -0.202 | -0.183 |
| <b>Ni<sup>2+</sup></b> | -10.882                                  | -34.823                                                 | 0.321                                    | 0.308  | 0.253  |
| <b>Cr<sup>3+</sup></b> | -13.185                                  | -38.171                                                 | 0.781                                    | 0.713  | 0.582  |

**Table S9.** Thermodynamic parameters for the metal ions sorption onto nPMMA<sub>SP</sub>.
